# Supplementary material for: Telomeric 8-oxo-guanine drives rapid premature senescence in the absence of telomere shortening
Source: PubMed Central journal article supplement (PMC9287163; doi:10.1038/s41594-022-00790-y), 2022-06-30

Figure 1b

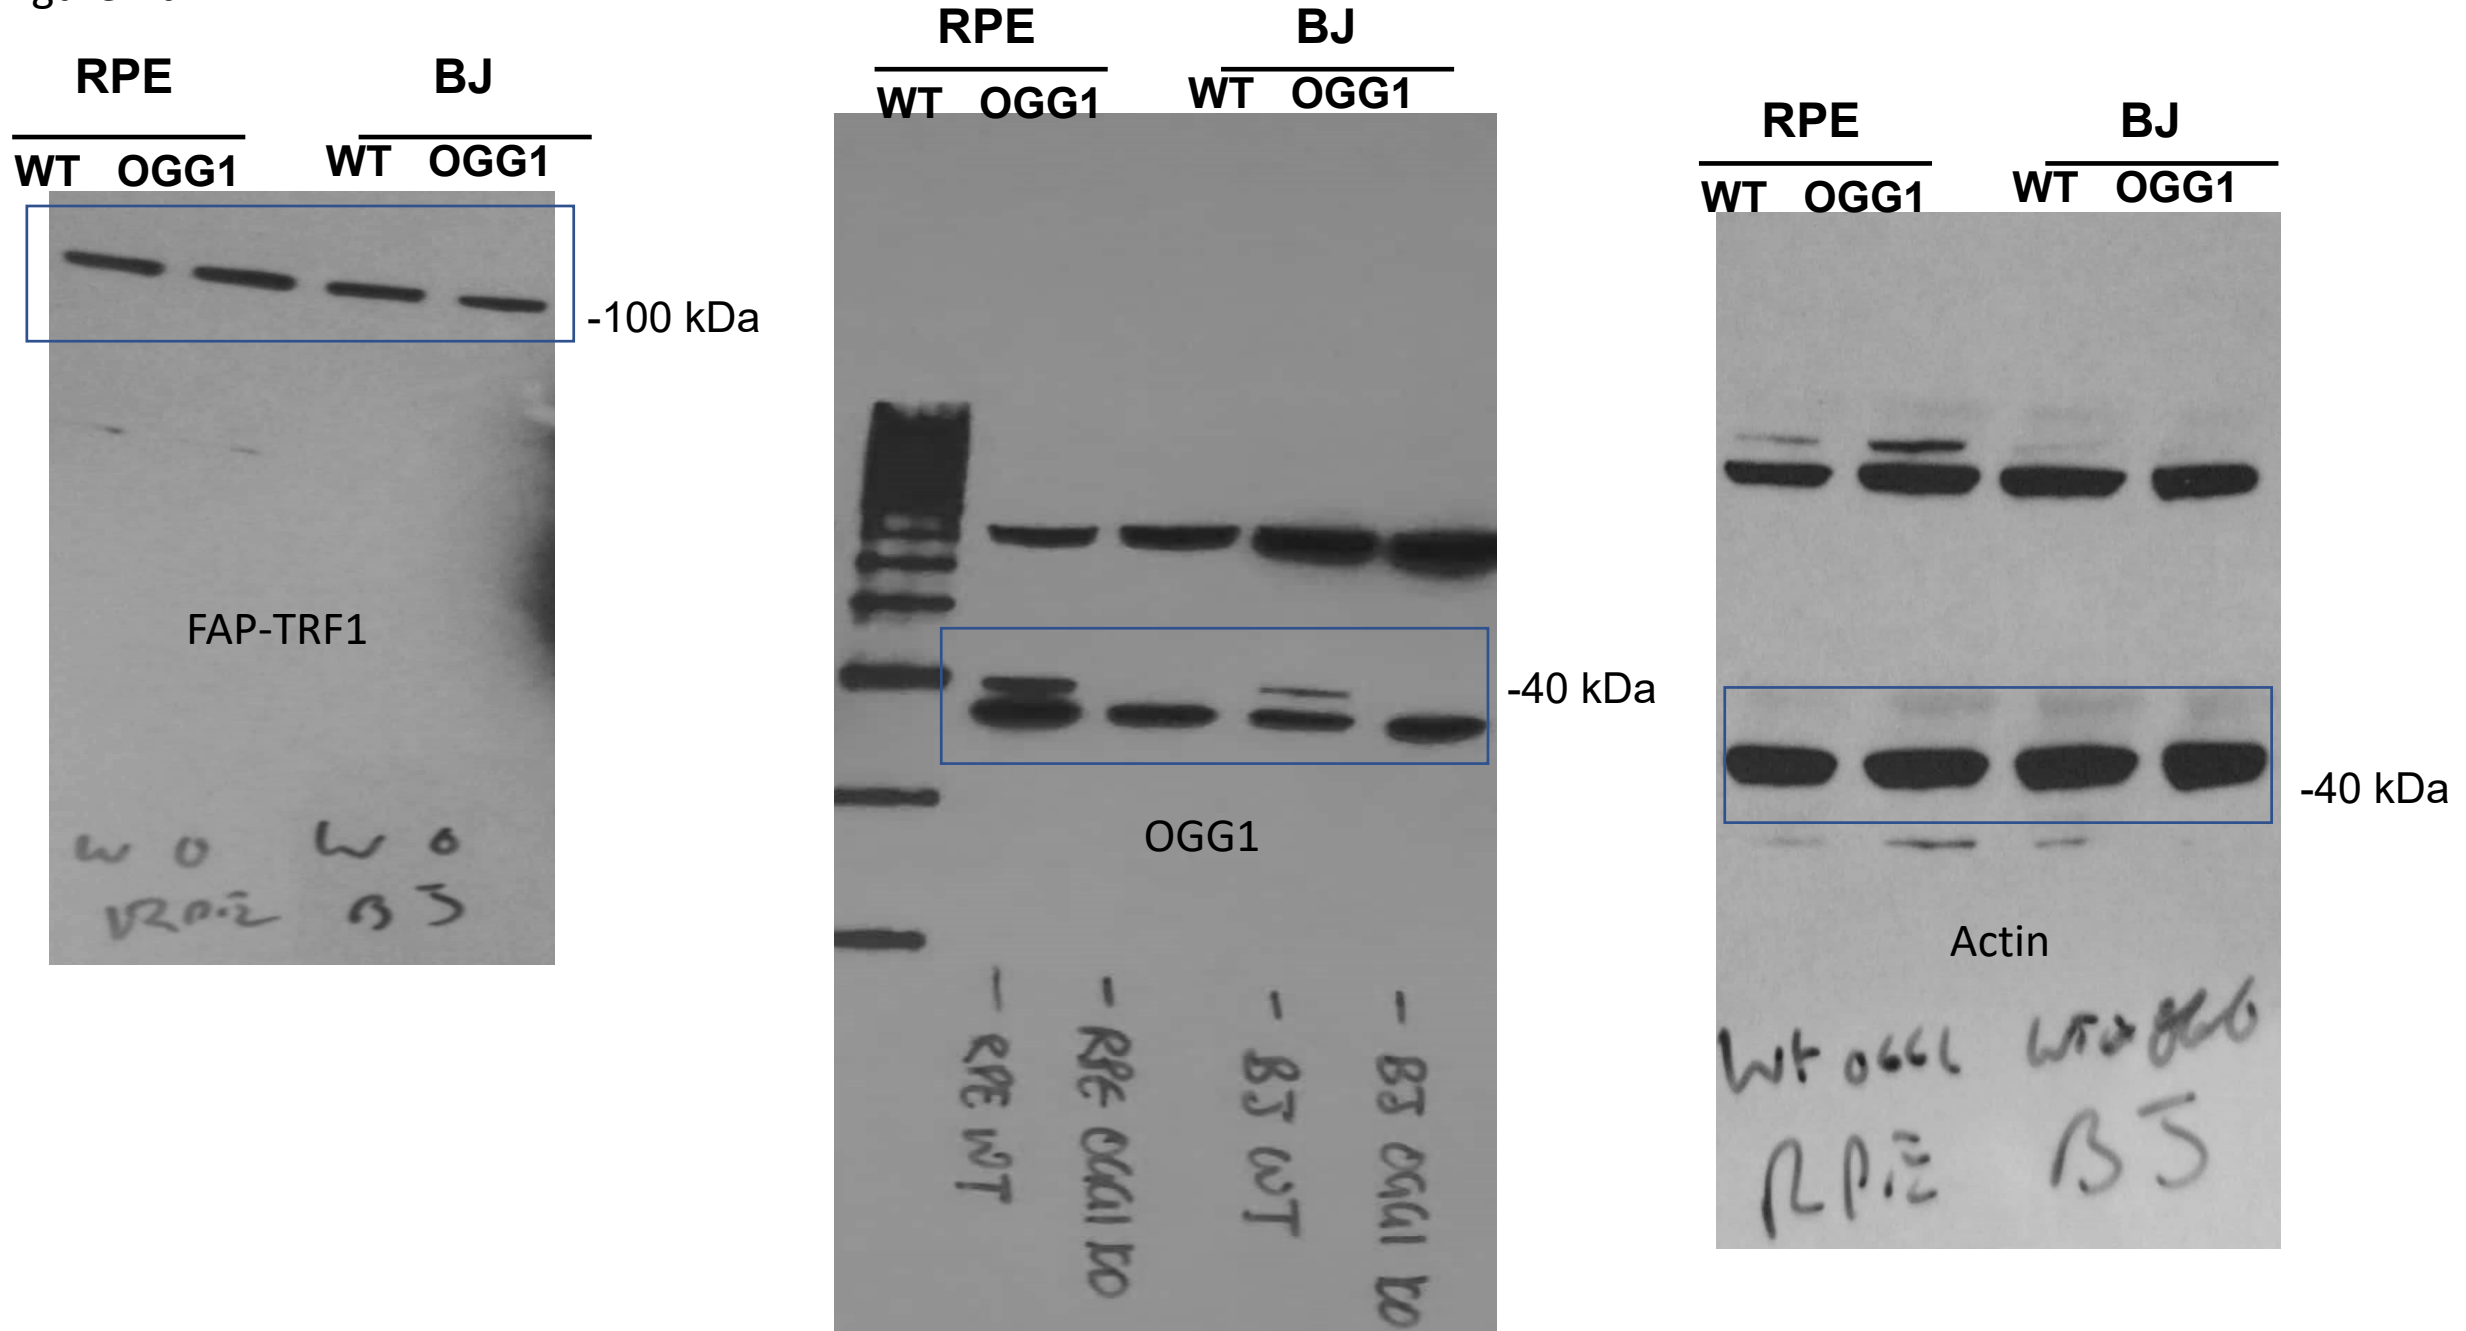

Supplement: 41594_2022_790_MOESM8_ESM.pdf [file 41594_2022_790_MOESM8_ESM.pdf]
